# Supplementary material
Source: Research Square preprint supplement (doi:10.21203/rs.3.rs-9603197/v1)
Supplement: Supplementary file 1 [file 9096c5b7e4dac19a3e470ae1.docx]

Table S1 5-Point global quality score for evaluating drug induced liver injury informational videos

| Scale | Description |
| --- | --- |
| 1 | Poor quality, poor flow of the site, most information missing, not at all useful for patients. |
| 2 | The content suffers from substandard quality and disjointed logical flow. While certain pieces of information are presented, a host of critical topics remain unaddressed, rendering it of minimal utility for patients. |
| 3 | The material is of moderate quality with suboptimal logical flow; while certain key information is elaborated adequately, other critical content lacks sufficient depth of discussion, rendering it of limited utility for clinical application among patients. |
| 4 | The material demonstrates high quality and logical coherence; while it encompasses most relevant information, certain topics remain unaddressed, rendering it still valuable for clinical application among patients. |
| 5 | Excellent quality and excellent flow, very useful for patients |

Table S2 The journal of the american medical association (JAMA) benchmark criteria.

| Score | Score component | |
| --- | --- | --- |
| 1 score | Authorship | Author and contributor credentials and their affiliations should be provided. |
| 1 score | Attribution | Clearly lists all copyright information and states references and sources for content. |
| 1 score | Currency | Initial date of posted content and subsequent updates to content should be provided. |
| 1 score | Disclosure | Conflicts of interest, funding, sponsorship, advertising, support, and video ownership  should be fully disclosed. |

Table S3 Modified dISCERN quality criteria for evaluating the reliability of videos(scoring rule: 1 point for a "yes" response, 0 point for a "no" response)

| Reliability Score |
| --- |
| 1. Is the video clear, concise, and understandable? |
| 2. Are valid sources cited? |
| 3. Is the content presented balanced and unbiased? |
| 4. Are additional sources of content listed for patient reference? |
| 5. Are areas of uncertainty mentioned? |
